# Supplementary material for: Synthesis ,Growth , Thermal and Third-order nonlinear optical studies of Bisglycine Lithium Perchlorate Single Crystal
Source: Research Square preprint supplement (doi:10.21203/rs.3.rs-2837383/v1), 2023-04-21
Supplement: Supplementary file 1 [file 37ecd496fb07ba5050f7d591.docx]

**Table 1:** FT-IR Vibrational frequencies with assignments of BGLP

| **Wavenumber(cm-1)** | | **Assignments** |
| --- | --- | --- |
| **FT – IR** | **FT – Raman** |
| 3575 | - | ( O – H) symmetric stretching |
| - | 3013 | NH2 stretching |
| 3117 | - | N – H asymmetric stretching |
| 2929 | 2875 | N – H symmetric stretching |
| 2692 | 2616 | CH2 asymmetric stretching |
| 2579 | - | CH2 symmetric stretching |
| 2220 | - | N – H bending |
| 2019 | - | N – H torsional |
| 1624 | 1718 | C = O asymmetric stretching |
| - | 1602 | NH2 deformation |
| 1558 | 1584 | NH2+ in – plane deformation |
| 1475 | 1493 | CH2scissoring |
| 1442 | 1450 | CH2 rocking |
| 1410 | - | CH2 wagging |
| 1144 | - | CH2rocking |
| 1328 | 1336 | CH2wagging |
| 1307 | - | CH2 wagging |
| 1113 | 1166 | CH2rocking |
| - | 1184 | NH2twisting |
| - | 1148 | ClO4 – symmetric stretching |
| 1030 | 1056 | C – N stretching |
| - | 990 | C – C stretching |
| 901 | - | ClO4 – asymmetric bending |
| - | 874 | C- C-N symmetric stretching |
| - | 832 | C- C-N symmetric stretching |
| - | 741 | C = O deformation |
| - | 717 | C = O deformation |
| - | 662 | COO- wagging vibration |
| 681 | - | COO- wagging |
| - | 620 | ClO4 – asymmetric stretching |
| 580 | - | COO- wagging |
| 538 | - | N – H torsional |
| 456 | 462 | Cl- in plane deformation |
| 410 |  | COO- wagging |
| - | 148 | COO- wagging |

**Table 2** Nonlinear optical parameters measured in Z – scan experiment

| Parameters | n2×10-11 (m2/W) | β × 10-3 cm/W | Re(χ3) × 10-9 esu | Im (χ3) × 10-10 esu | | (χ3) × 10-7 esu |
| --- | --- | --- | --- | --- | --- | --- |
| Measured values | 1.17102 | 0.362618 | 181.1103 | 710.095 | 2.7962 | |

**Table 3 Compositional analysis of BGLP single crystal**

| **Element** | **Weight %** | **Atomic%** |
| --- | --- | --- |
| C | 21.08 | 27.44 |
| N | 21.46 | 21.195 |
| O | 41.139 | 42.41 |
| Cl | 11.198 | 6.17 |
| Ca | 0.09 | 0.03 |
| Total | 100 | 100 |

**Table 4 Antibacterial Activities of BGLP**

| Types of microorganism | Test organisms | Zone of inhibition in millimetre (diameter) | | | |
| --- | --- | --- | --- | --- | --- |
| 25 µg/mL | 50 µg/mL | 100 µg/mL | Standard - Norfloxacin |
| *Gram positive bacteria* | *Staphylococcus aureus* | 10 | 11 | 12 | 18 |
| *Gram negative bacteria* | *E. coli* | 11 | 12 | 14 | 20 |
